# Supplementary material
Source: publisher figshare collection journal article supplement (https://gsapubs.figshare.com/ndownloader/files/23317646)
Supplement: Supplementary file 1 [file 23317646]

## Sheet: Table DR4
TABLE DR4. RAW DATA FROM PALEOMAGNETIC ANALYSES OF THE BURNEY MOUNTAIN DACITE DOME COMPLEX
Unit - Sample number Site ID	Nature of site demagnetization	Inclination (°)	Declination (°)	Pole Azimuth (°)	Pole Dip (°)	Steps (mT)	α95 (°)
db1 - B15DD025
8155B-1	Line	54.1	4.1	---	---	5 - 80	0.2
8165B-1	Line	49.7	9.4	---	---	5 - 80	0.2
8175B-1	Line	52.7	9	---	---	10 - 80	0.2
8185B-1	Line	50.3	12.2	---	---	5 - 80	0.3
8195B-1	Line	49.9	13.9	---	---	15 - 80	0.3
8205B-1	Line	47.1	4.6	---	---	5 - 80	0.7
8225B-1	Line	55.1	5	---	---	20 - 80	0.4
8215B-1	Plane	---	---	160.8	32.3	10 - 80	1.5
db2 - B15DD029
8475B-1	Line	54.4	341.6	---	---	5 - 30	1.6
8485B-1	Line	57.7	347.5	---	---	70 - 80	0.1
8495B-1	Line	61.6	356.6	---	---	70 - 80	0.1
8505B-1	Line	62.6	0.5	---	---	60 - 80	0.1
8515B-1	Line	58.4	3.5	---	---	60 - 80	0.1
8525B-1	Line	64.7	358.4	---	---	70 - 80	0.2
8535B-1	Line	56.3	356.8	---	---	60 - 80	1.9
8545B-1	Line	54.6	345.3	---	---	70 - 80	0.1
8555B-1	Line	58.6	348.4	---	---	20 - 80	1
db2 - B16DD066
9386B-1	Line	54.2	351.3	---	---	50 - 80	0.2
9416B-1	Line	53.8	355.4	---	---	70 - 80	0.3
9426B-1	Line	50.9	353.3	---	---	60 - 80	0.1
9436B-1	Line	53.3	354	---	---	60 - 80	0.2
9446B-2	Line	52.7	350.9	---	---	70 - 80	0.4
9456B-1	Line	57	355.1	---	---	60 - 80	0.1
9396B-2	Plane	---	---	324.6	-31.7	5 - 80	1.2
9406B-1	Plane	---	---	68.3	-11.9	5 - 80	3
9466B-1	Plane	---	---	141.4	35.7	10 - 80	0.3
db3 - LM81-1133
8315B-2	Line	54.2	352.4	---	---	5 - 80	1.3
8325B-1	Line	57.5	357.1	---	---	10 - 80	0.7
8335B-1	Line	52	351.4	---	---	30 - 80	0.3
8345B-1	Line	60	357.6	---	---	30 - 80	0.2
8355B-1	Line	52.2	354.6	---	---	30 - 80	0.2
8365B-1	Line	54.5	355.6	---	---	10 - 80	0.7
8375B-1	Line	58.8	359.2	---	---	25 - 80	0.9
8385B-1	Line	60.3	1	---	---	50 - 80	0.3
db4 - LM13-4779
8395B-1	Line	53.3	326.6	---	---	10 - 80	0.7
8405B-1	Line	39.9	330.8	---	---	10 - 80	0.5
8415B-1	Line	56.9	332	---	---	15 - 80	2.1
8425B-1	Line	54.9	322.9	---	---	20 - 80	1.5
8435B-1	Line	52.5	326.9	---	---	15 - 80	1.2
8445B-1	Line	53.3	337.9	---	---	5 - 80	1.1
8455B-1	Line	54.9	332.7	---	---	20 - 80	1.1
8465B-1	Line	52.3	327.2	---	---	10 - 80	0.6
db5 - B16DD064
9306B-1	Line	17.4	222.8	---	---	40 - 80	0.3
9316B-1	Line	69.4	310.1	---	---	30 - 80	0.3
9326B-1	Line	68.9	317.7	---	---	40 - 80	0.3
9336B-2	Line	67.3	314.7	---	---	40 - 80	0.3
9346B-1	Line	69.7	306.9	---	---	40 - 80	0.4
9356B-1	Line	70.6	315.5	---	---	40 - 80	0.2
9366B-1	Line	69.5	307.9	---	---	40 - 80	0.3
9376B-1	Line	68.1	311.7	---	---	40 - 80	0.3
db6 - B16DD060
9226B-1	Line	61.8	349.6	---	---	5 - 80	1.1
9236B-1	Line	59.8	349.4	---	---	15 - 80	1
9245B-1	Line	58.7	350.5	---	---	10 - 80	0.8
9256B-1	Line	60	358	---	---	10 - 80	1.1
9265B-1	Plane	---	---	220.4	29.1	15 - 80	3.8
9276B-1	Plane	---	---	218.3	28.6	5 - 60	6.2
9286B-1	Plane	---	---	211.7	27.3	0 - 60	7.5
9296B-1	Plane	---	---	32	-29.2	5 - 30	11.5
Note: Site ID is the core and specimen identifier. Inclination and declination (in degrees) for the line fit to progressive. Pole azimuth and pole dip (in degrees) are the azimuth and dip of the great circle plane fit to progressive alternating-field demagnetization data. Steps are the range of alternating-field demagnetization values used in the line and plane fits. α95 (in degrees) is the 95% c…
